# Supplementary material for: Head and neck cancer and asbestos exposure
Source: HighWire-hosted journal article supplement (doi:10.1136/oemed-2021-108047), 2022-04-07
Supplement: oemed-2021-108047supp001_data_supplement.pdf [file oemed-2021-108047supp001_data_supplement.pdf]

**Top 10 occupations (regardless of exposure) among all subjects included, excluding laryngeal cancers (N=12,685)**

| Occupations by ISCO                                        | n     | %    |
|------------------------------------------------------------|-------|------|
| 9-99.10 Labourer                                           | 1,640 | 12,9 |
| 8-49.70 Plant Maintenance Mechanic                         | 1,279 | 10,1 |
| 9-51.90 Other Bricklayers, Stonemasons and Tile Setters    | 1,034 | 8,2  |
| 8-73.10 Sheet Metal Worker (General)                       | 902   | 7,1  |
| 8-43.20 Automobile Mechanic                                | 881   | 6,9  |
| 8-72.10 Gas and Electric Welder (General)                  | 758   | 6,0  |
| 8-71.05 Plumber (General)                                  | 711   | 5,6  |
| 8-71.10 Pipe Fitter (General)                              | 690   | 5,4  |
| 7-00.75 Supervisor and General Foreman (Construction Work) | 620   | 4,9  |
| 9-59.10 Housebuilder (General)                             | 604   | 4,8  |

**Top 10 occupations (regardless of exposure) among subjects presenting with head and neck cancer, excluding laryngeal cancers (N=102)**

| Occupations by ISCO                                        | n  | %    |
|------------------------------------------------------------|----|------|
| 9-99.10 Labourer                                           | 21 | 20,6 |
| 8-49.70 Plant Maintenance Mechanic                         | 14 | 13,7 |
| 8-71.10 Pipe Fitter (General)                              | 13 | 12,7 |
| 8-43.20 Automobile Mechanic                                | 11 | 10,8 |
| 8-73.10 Sheet Metal Worker (General)                       | 10 | 9,8  |
| 7-00.75 Supervisor and General Foreman (Construction Work) | 9  | 8,8  |
| 8-71.05 Plumber (General)                                  | 9  | 8,8  |
| 8-72.10 Gas and Electric Welder (General)                  | 9  | 8,8  |
| 9-51.90 Other Bricklayers, Stonemasons and Tile Setters    | 9  | 8,8  |
| 9-71.20 Docker                                             | 9  | 8,8  |
