# Supplementary figures and images for: Head and neck cancer and asbestos exposure
Source: HighWire-hosted journal article supplement (doi:10.1136/oemed-2021-108047), 2022-04-07

**Supplemental figure: Study flow chart**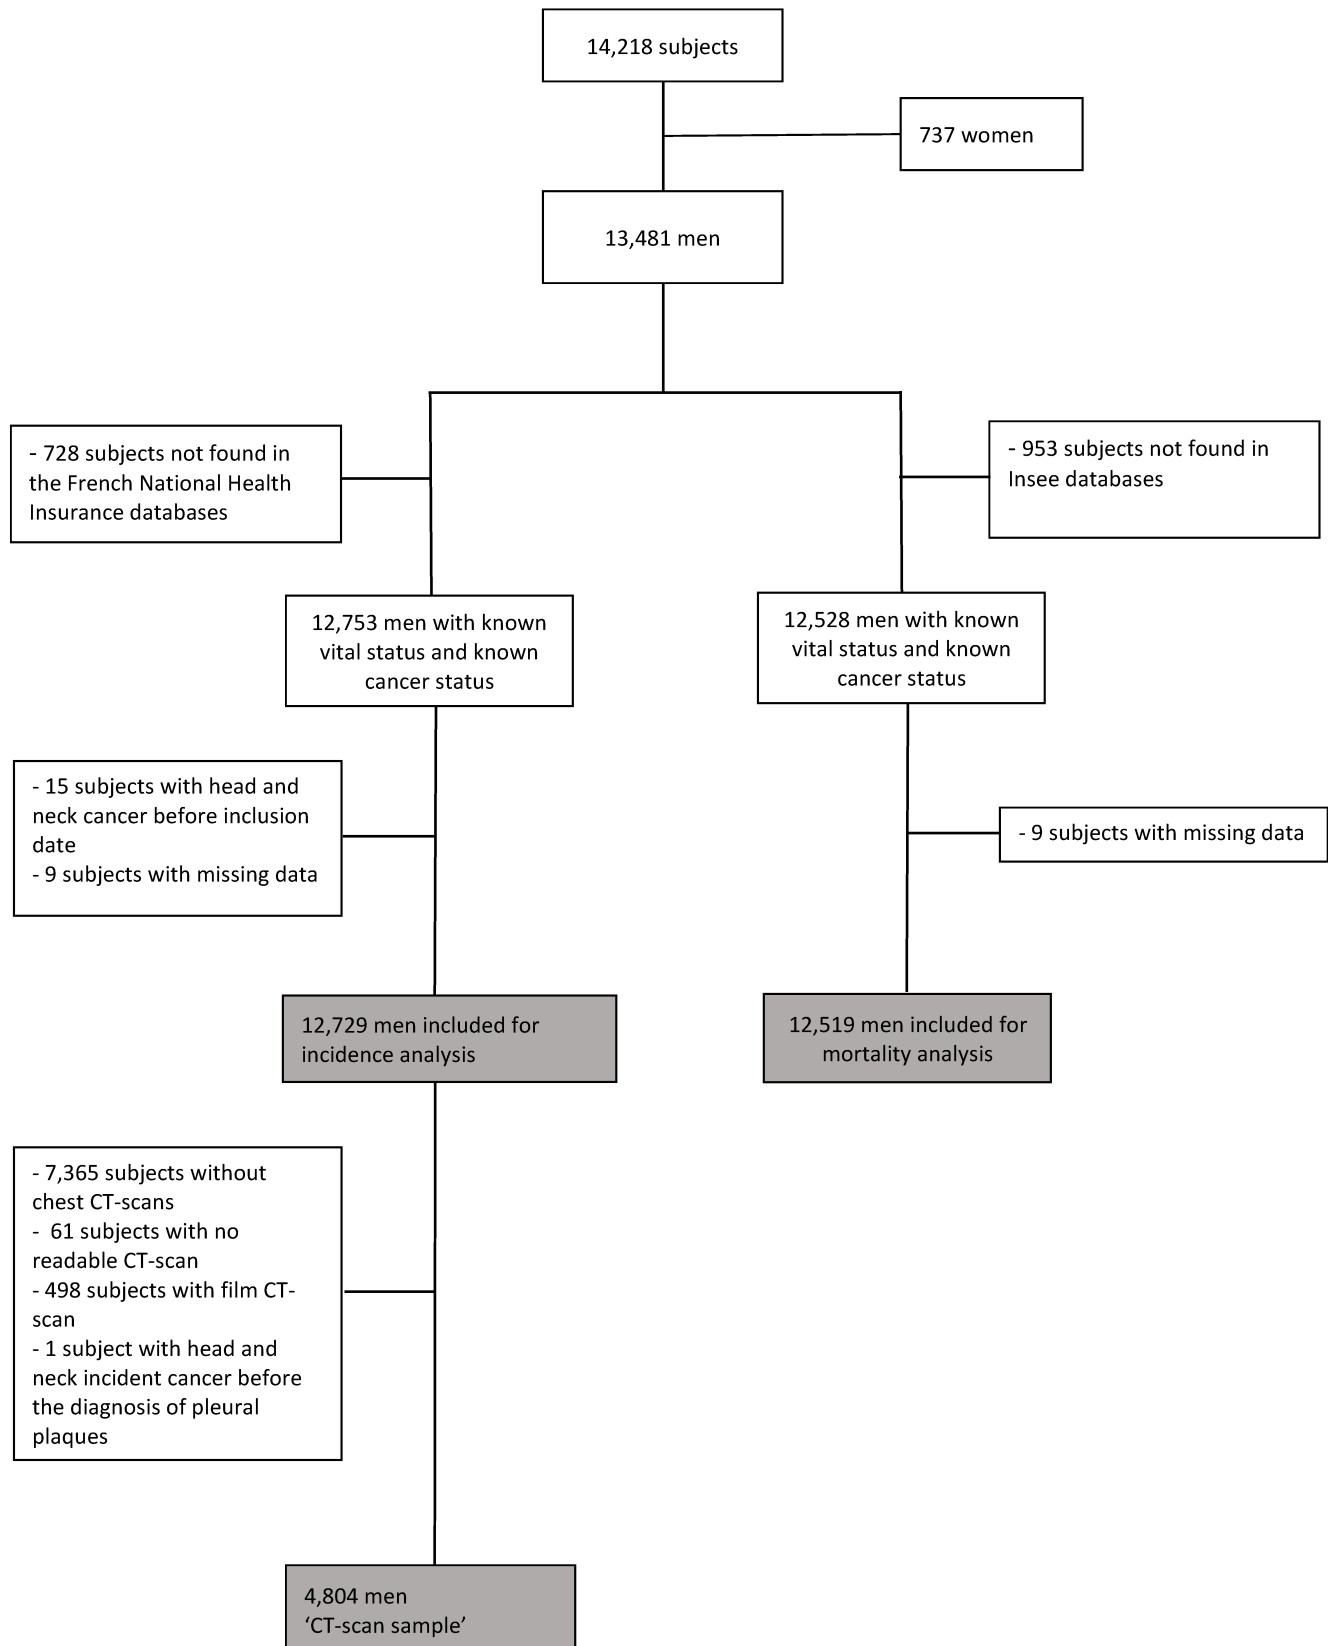

Supplement: oemed-2021-108047supp002_data_supplement.pdf [file oemed-2021-108047supp002_data_supplement.pdf]
